# Supplementary material for: One N-glycan regulates natural killer cell antibody-dependent cell-mediated cytotoxicity and modulates Fc γ receptor IIIa/CD16a structure
Source: eLife. 2024 Oct 25;13:RP100083. doi: 10.7554/eLife.100083 (PMC11509673; doi:10.7554/eLife.100083)
Supplement: Supplementary file 1. [file elife-100083-supp1.xlsx]

## Sheet: Sheet1
	Binding to fucosylated IgG1 Fc			Binding to afucosylated IgG1 Fc
FcγR3a Variant	KD (nM)	StdDev (nM)		KD (nM)	StdDev (nM)
EndoF F153S	35.07	22.98		44.4	38.18
EndoF R155S	105.77	13.44		86.27	3.57
EndoF S164A	111.73	54.12		118.8	41.3
EndoF S164A F153S	243	59.4		167	55.15
EndoF S164A V158F	381.5	62.93		320	72.12
EndoF S164A R155S	116	18.38		124.5	16.26
EndoF T167Y	261	151.32		225.5	95.46
EndoF V158	21.74	5.41		17.88	6.61
EndoF Y132S	12876.7	7035.73		7530	1547.87
F153S	322.75	144.04		133.95	44.51
V158F	944.75	228.5		238.75	58.96
G129D	>10000	n.a.		>10000	n.a.
H119A	477	100.8		225.67	78.78
H134A	771.67	251.14		339.67	80.03
I88A	360.33	269.47		227.77	239.49
K120A	1385	529.79		597	142.28
K128A	659.67	68.97		316.67	175.3
K128A R155S	n.b.	n.a.		n.b.	n.a.
K131A	549	223.76		330.6	211.95
K161A	2723.33	1201.68		1153.33	55.08
L124A	734.67	134.94		339	198.55
L157S	324.33	44.41		475.67	304.08
N162Q	200	103.58		118.3	44.83
R155S	637.67	117.59		619	435.44
S160A	326	142.04		131.53	59.71
S164A	159.13	76.79		92.19	67.71
S164A F153S	136.33	5.86		93.13	20.82
S164A V158F	1105	35.36		710.5	154.86
S164A I158	124.55	64.28		87.7	38.61
S164A K128A	252.5	58.69		189	84.85
S164A Man 3	108.53	42.75		15.43	3.88
S164A Man1	95.93	31.82		n.t.	n.a.
S164A N	131.98	34.7		n.t.	n.a.
S164A NG	112.45	50.15		n.t.	n.a.
S164A NGG	106.35	49.22		n.t.	n.a.
S164A R155S	128.3	88.67		94.25	71.77
S164A T171A	147.35	140.93		132.7	110.73
T122A	1197.67	462.08		640.33	221.41
T167Y	229	62.22		164	58.56
T171A	n.b.	n.a.		555.66	1031.54
V158	305.35	130.44		168.37	295.84
V158 Man 1	95	53.53		n.t.	n.a.
V158 Man3	27.5	14.65		15.63	3.42
V158 N	123.15	33.57		20.9	12.54
V158 NG	109.92	22.05		17.57	9.95
V158 NGG	87.78	24.99		13.71	7.19
V158I	210.27	98.28		101.77	67.45
W113A	n.b.	n.a.		>10000	n.a.
W90A	n.b.	n.a.		9040	1559.52
Y132S	n.b.	n.a.		>10000	n.a.
