# Supplementary material for: One N-glycan regulates natural killer cell antibody-dependent cell-mediated cytotoxicity and modulates Fc γ receptor IIIa/CD16a structure
Source: eLife. 2024 Oct 25;13:RP100083. doi: 10.7554/eLife.100083 (PMC11509673; doi:10.7554/eLife.100083)
Supplement: Supplementary file 2. — V158 = wt; aRTX = afucosylated rituximab; K = kifunensine treatment. [file elife-100083-supp2.xlsx]

## Sheet: Sheet1
	V158 RTX	V158 aRTX	V158 +K RTX	V158 +K aRTX	V158F RTX	V158F aRTX	V158F +K RTX	V158F +K aRTX	S164A RTX	S164A aRTX	S164A +K RTX	S164A +K aRTX	T167Y RTX	T167Y aRTX	T167Y +K RTX	T167Y +K aRTX
date
	9.2	14.8	9.4	14.2	0.9	11.7	1	16.1	10.5	8.4	6.2	-2	9.7	36.4	12.1	39.3
2023-12-06	9.7	13.8	11.6	15.2	1.9	11.3	1.3	11.1	9.5	4.4	6.6	4.9	5.4	46.7	15.8	54.8
	7	13.5	9.6	26.2	-0.6	22.7	2.4	30.9	7.7	8.3	9.7	13.8	7.3	66.5	20.5	63.8
	3.3	35.2	25.2	42.9	1.9	18.6	3	25.4	21.2	25.1	17.8	25.1	9.4	9	10.5	40
2023-12-13	17.7	40.1	23.5	39.5	1.4	15.1	4.3	28.7	19.1	23.9	19.7	23.2	8.3	17.6	20.6	26.7
	17.7	38.6	24.4	43.1	-0.2	18.1	3.6	21.6	14.7	24.3	19.6	21.7	9.6	20.3	20.8	38.3
	14.6	45.5	24.4	51.8	12.4	18.2	16.8	24.7	0.6	19.1	4.6	30.8	19.4	52.1	26.7	39
2023-12-20	13.8	47.5	30.1	54.2	10.6	31	19.5	28.1	2.9	34.4	4.8	36.2	24.1	53.1	24.6	36.84
	14.7	39	25.8	44.6	12.4	29.2	13.6	22.1	0.3	31	3.6	37.9	14.5	42.7	21.4	40.44
average	12	32	20	37	5	20	7	23	9.6	20	10.3	21	12	38	19	42
