# Supplementary figures and images for: One N-glycan regulates natural killer cell antibody-dependent cell-mediated cytotoxicity and modulates Fc γ receptor IIIa/CD16a structure
Source: eLife journal article supplement (doi:10.7554/elife.100083), 2024-08-21

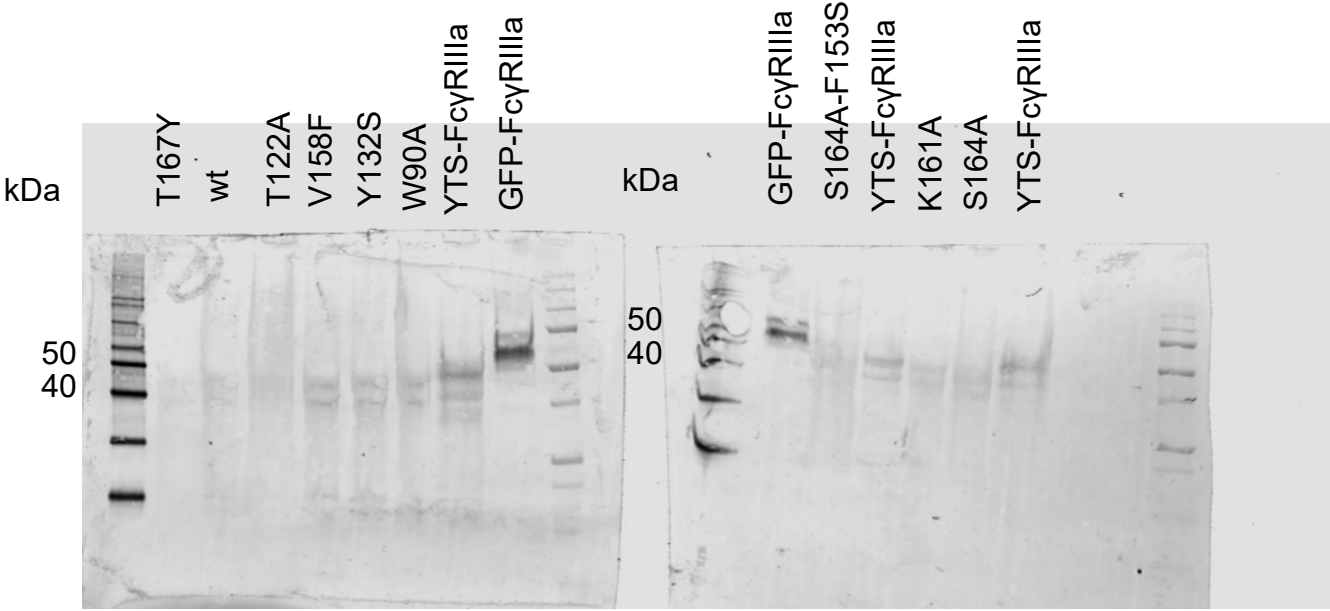

kDa

YTS-FcγRIIIa  
wt  
W90A  
Y132S  
T122A  
V158F  
T167Y  
S164A  
K161A  
S164A-F153S

40

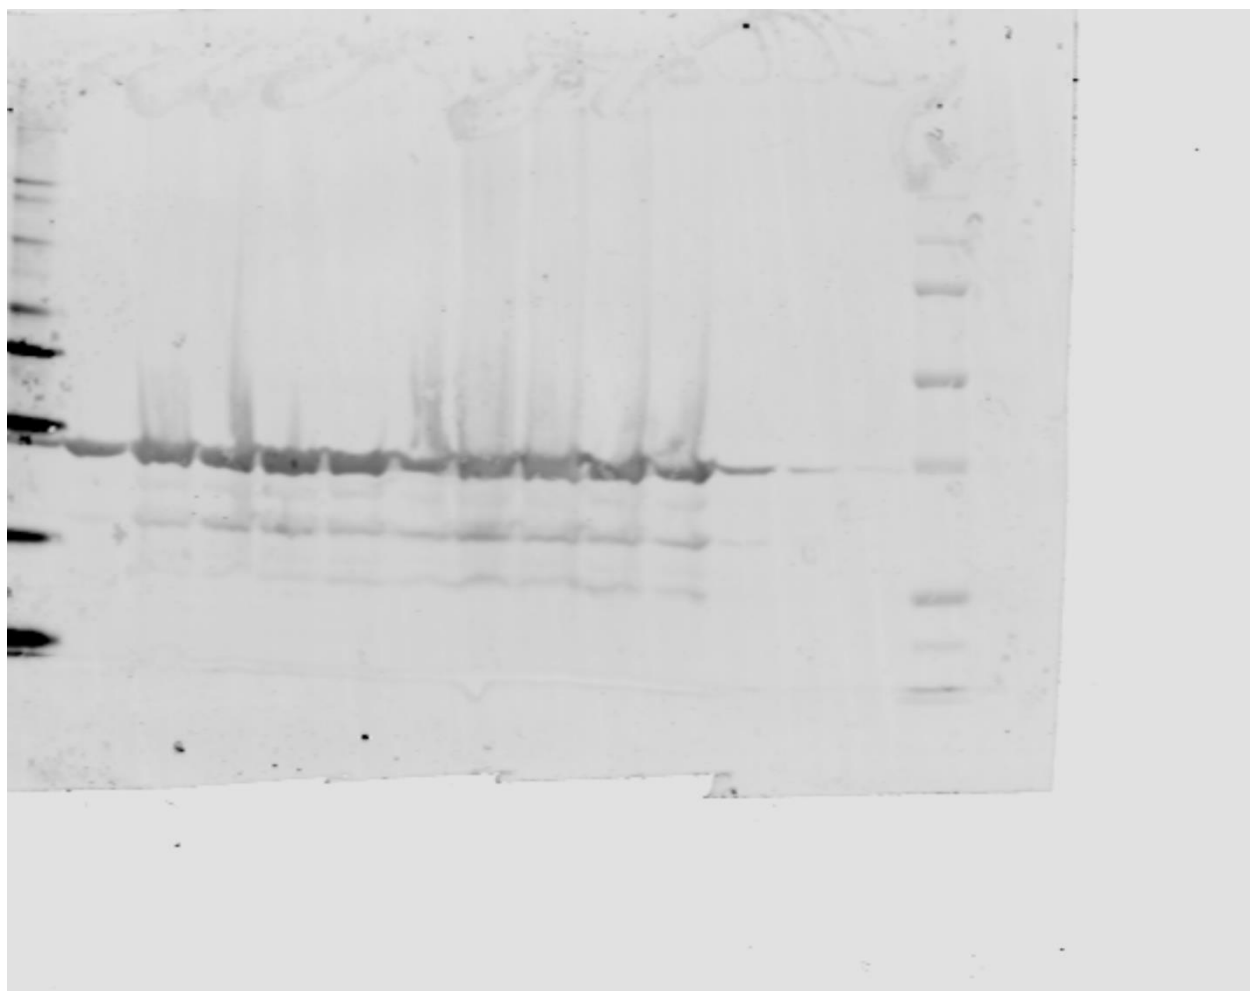

Supplement: fig1-figsupp1-data2 [file elife-100083-fig1-figsupp1-data2-v1.zip]

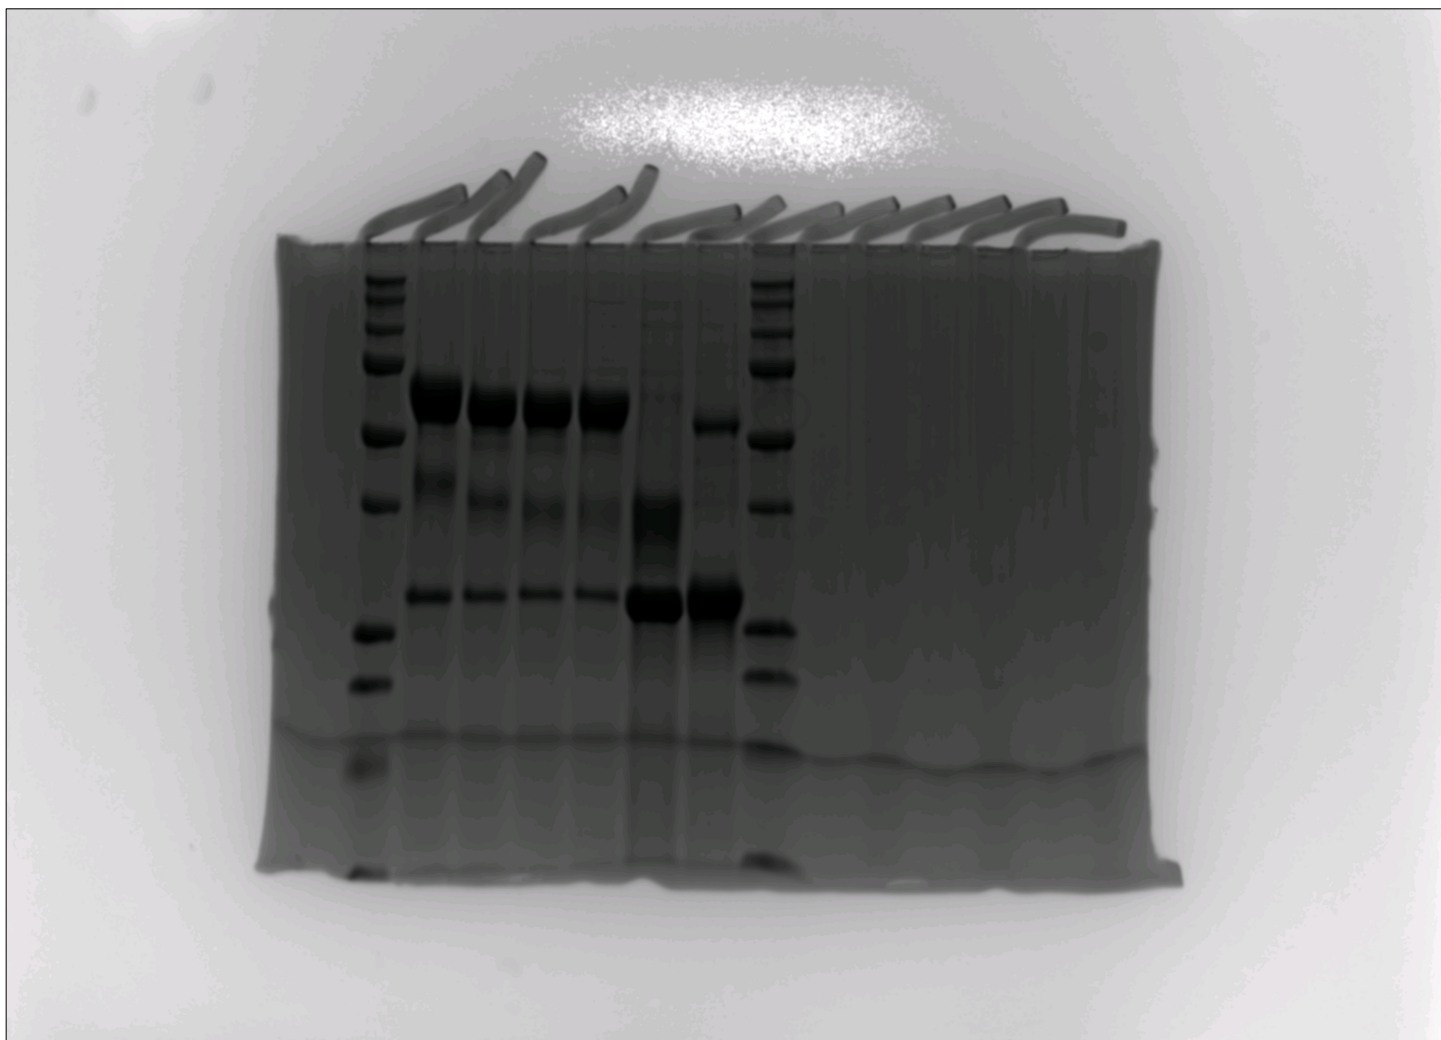

Supplement: fig2-figsupp1-data1 [file elife-100083-fig2-figsupp1-data1-v1.zip]

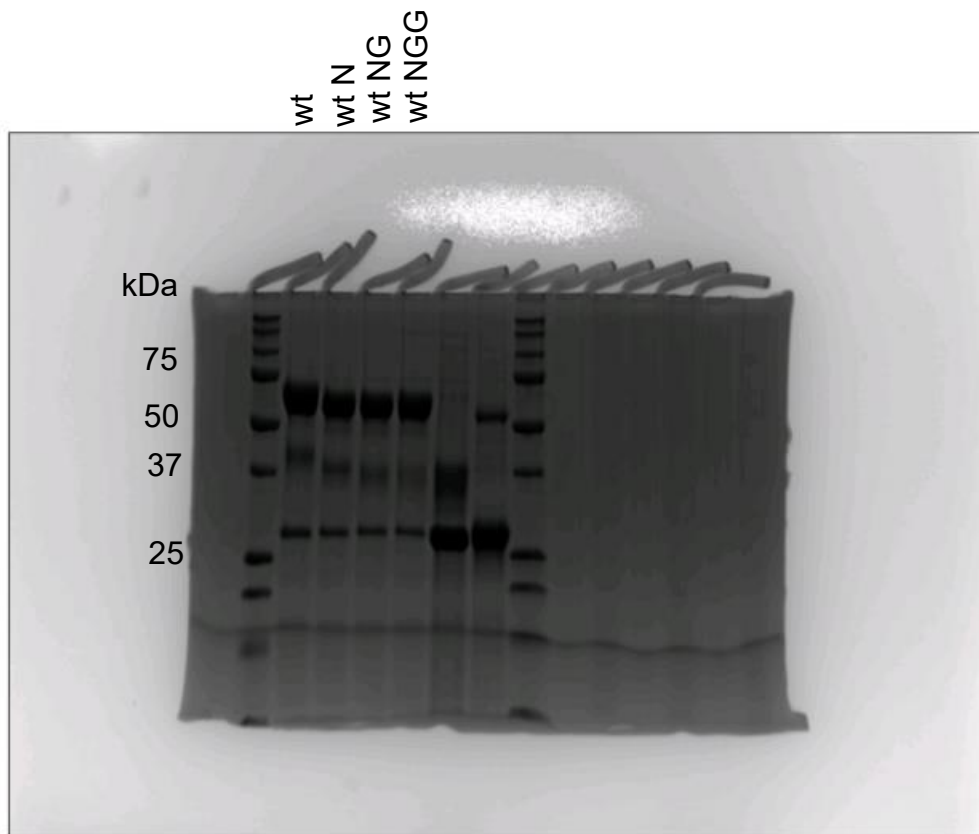

Supplement: fig2-figsupp1-data2 [file elife-100083-fig2-figsupp1-data2-v1.zip]
